# Supplementary material
Source: PubMed Central journal article supplement (PMC3486442)

STRUCTURE OF CRIMEAN-CONGO HAEMORRHAGIC FEVER VIRUS  
NUCLEOPROTEIN: SUPERHELICAL HOMO-OLIGOMERS AND THE ROLE OF  
CASPASE-3 CLEAVAGE

**Yi Wang<sup>1,¶</sup>, Sujit Dutta<sup>2,3,¶</sup>, Helen Karlberg<sup>4,5</sup>, Stéphanie Devignot<sup>6</sup>, Friedemann  
Weber<sup>6</sup>, Quan Hao<sup>1</sup>, Yee Joo Tan<sup>2,7</sup>, Ali Mirazimi<sup>4,5,8,#</sup>, Masayo Kotaka<sup>1,#</sup>**

From the <sup>1</sup>Department of Physiology, Li Ka Shing Faculty of Medicine, University of Hong  
Kong, Pokfulam, Hong Kong SAR, China

<sup>2</sup>Institute of Molecular and Cell Biology, Agency for Science, Technology & Research  
(A\*Star), Singapore 138673

<sup>3</sup>School of Life Sciences & Chemical Technology, Ngee Ann Polytechnic, Singapore 599489

<sup>4</sup>Center for Microbiological Preparedness/Swedish Institute for Infectious Disease Control,  
SE-171 82, Solna, Sweden

<sup>5</sup>Department of Microbiology, Tumor and Cell Biology, Karolinska Institutet, SE-171 77  
Stockholm, Sweden

<sup>6</sup>Institute for Virology, Philipps University Marburg, D-35043 Marburg, Germany

<sup>7</sup>Department of Microbiology, Yong Loo Lin School of Medicine, National University Health  
System, National University of Singapore, Singapore 117597

<sup>8</sup>Department of Clinical and Experimental Medicine, Linköping University, SE-581 85  
Linköping, Sweden

**SUPPLEMENTAL INFORMATION**

Supplemental figure 1. Gel filtration profile of CCHFV N on superdex200 16/60 column (GE Healthcare). Peak 1 (P1) is eluted at a position which corresponds to an apparent molecular weight of > 300 kDa. Peak 2 (P2) is eluted at a position corresponding to an apparent molecular weight of ~60 kDa.

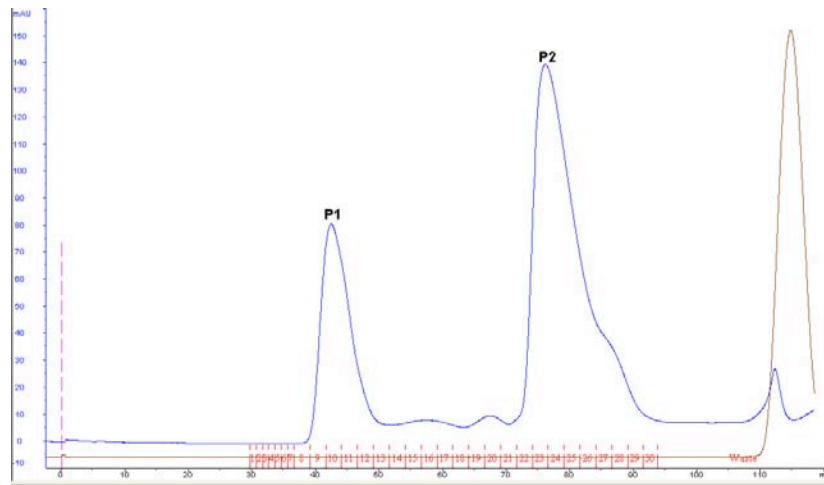

Supplemental figure 2. Stereoview of interdomain linker observed in molecule B of CCHFV N crystallised in oligomerised form. Simulated annealing omit map is contoured at  $4\sigma$ .

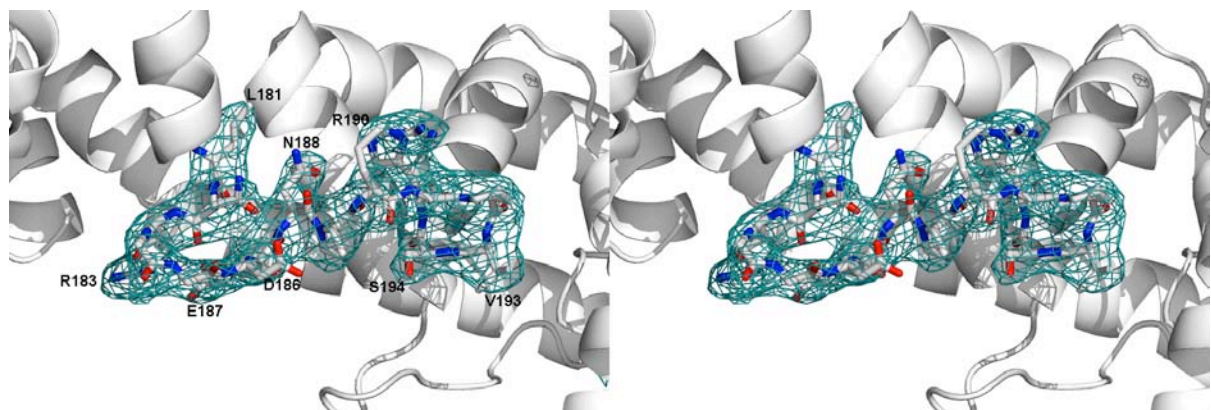

Supplemental figure 3. Comparison of crystal structures of CCHFV N strain IbAr10200 against strain YL040570. A. Sequence alignment of CCHFV N of the two strains. The conserved caspase-3 cleavage sequence is highlighted by blue triangles. B. Stereoview depicting the one amino acid shift difference observed between in  $\alpha 11$  of CCHFV N strain IbAr10200 and strain YL040570. CCHFV N of strain IbAr10200 is coloured in white while strain YL040570 is shown in green. C. The difference in the position of the stalk of CCHFV N of the two strains. The structures are coloured in accordance to Figure B.

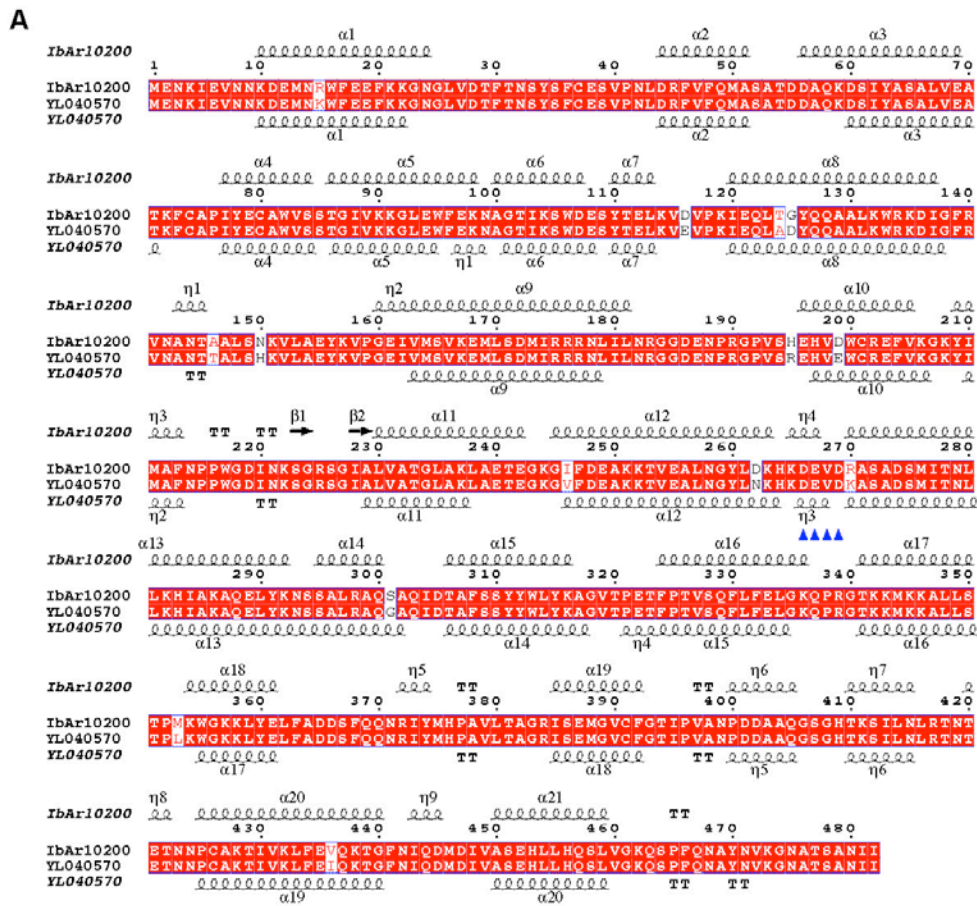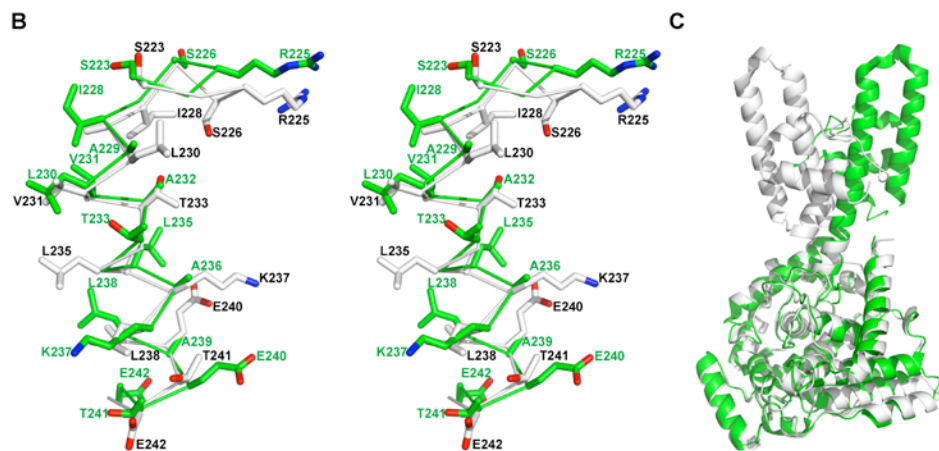



Supplemental figure 5. Sequence alignment of CCHFV N against Ns of other Nairoviruses including Dugbe virus, Hazara virus, Kupe virus and Nairobi sheep disease virus (NSDV). Magenta stars depict conserved positively charged residues and the conserved caspase-3 cleavage sequence is highlighted by blue triangles.

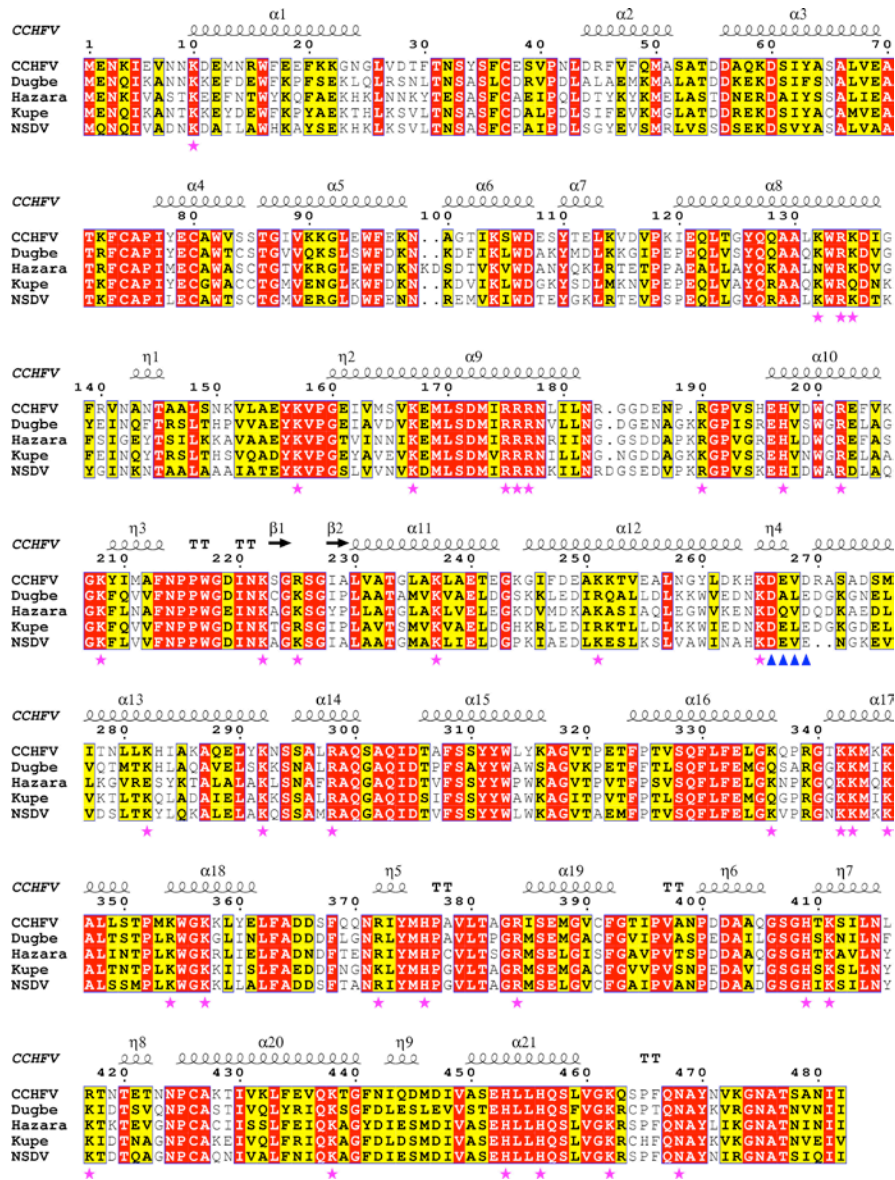

Supplement: JVI.01627-12_zjv999096826so1.pdf [file JVI.01627-12_zjv999096826so1.pdf]
